# Supplementary material
Source: MDPI journal article supplement (https://www.mdpi.com/2073-4395/12/10/2573)
Supplement: s1 [file s1]

**Table S1. Nucleotide sequences of primers used for PCR and RT-qPCR**

| <b>Purpose</b>                        | <b>Primer name</b>        | <b>Forward primer 5'-3'</b>                   | <b>Reverse primer 5'-3'</b>                      |
|---------------------------------------|---------------------------|-----------------------------------------------|--------------------------------------------------|
| <b>Clone</b>                          | BcHY5                     | ATGCAGGAGCAAACGACTAG                          | TCAGAGGCTCGCATCAGCGTT                            |
|                                       | BcBBX24                   | ATGAAAATACAGTGTGATGTG                         | ATTGTCCCTGATCTAGGCTAA                            |
|                                       | proBcHY5                  | CAATTATTTTTATTTTAATA                          | CGTCAGATTCTCTATCAATC                             |
| <b>Subcellular Localization</b>       | BcHY5-GFP                 | GTCGACCCCGGGGTACC<br>ATGCAGGAGCAAACGACTAG     | GGATCCATGGTGAGCAAGGG<br>G GAGGCTCGCATCAGCGTT     |
| <b>BiFC</b>                           | BcHY5-nYFP                | TCTCGAGCTTTTCGCGAGCTC<br>ATGCAGGAGCAAACGACTAG | TCTAGAAGATCCATCGCC<br>GAGGCTCGCATCAGCGTT         |
|                                       | BcBBX24-cYFP              | AGGAGGACCTGCTTTCTAGA<br>ATGAAAATACAGTGTGATGTG | TCTAGACTCGAGGGATCCG<br>G ATTGTCCCTGATCTAGGC      |
| <b>Y2H</b>                            | BcHY5-BD                  | TGGCCATGGAGGCCGAATTC<br>ATGCAGGAGCAAACGACTAG  | GGATCCGTCGACCTGCAGC<br>G GAGGCTCGCATCAGCGTT      |
|                                       | BcBBX24-AD                | CCATGGAGGCCAGTGAATTC<br>ATGAAAATACAGTGTGATGTG | GGATCCATCGAGCTCGAGC<br>T ATTGTCCCTGATCTAGGC      |
| <b>GST pull - down</b>                | BcHY5-His                 | GCCATGGCTGATATCGGATC<br>ATGCAGGAGCAAACGACTAG  | GAATTCGAGCTCCGTCGAC<br>A GAGGCTCGCATCAGCGTT      |
|                                       | BcBBX24-GST               | ATCTGGTTCCGCGTGGATCC<br>ATGAAAATACAGTGTGATGTG | GAATTCCTGGGTCGACTCG<br>A ATTGTCCCTGATCTAGGC      |
| <b>Y1H</b>                            | pAbAi-proBcHY5            | AAATGATGAATTGAAAAGCTT<br>CAATTATTTTTATTTTAATA | CATACAGAGCACATGCCTC<br>G<br>CGTCAGATTCTCTATCAATC |
| <b>Dual-luciferase reporter assay</b> | proBcHY5-pGreenII0800-LUC | GGTATCGATAAGCTT<br>CAATTATTTTTATTTTAATA       | GGATCCACTAGTTCT<br>CGTCAGATTCTCTATCAATC          |
|                                       | 35S:BcBBX24-GFP           | GTCGACCCCGGGGTACC<br>ATGAAAATACAGTGTGATGTG    | GGATCCATGGTGAGCAAGGG<br>G GCCTAGATCAGGGACAAT     |
| <b>RT-qPCR</b>                        | AtHY2                     | TGAACCTTCACATCTCCAGGAA                        | CCTTAGCAGCTCCTTTGCCT                             |
|                                       | AtYUC8                    | CCTGAGGACTTCCCGGAGTA                          | ACAAGCCACTGGTCTCATCG                             |

|  |         |                              |                              |
|--|---------|------------------------------|------------------------------|
|  | AtActin | ATGCTGGTATCCATGAAACC<br>ACCT | CCTGTGAACAATCGATGGA<br>CCTGA |
|--|---------|------------------------------|------------------------------|

**Table S2. Proteins sequences of HY5**

|       |                                                                                                                                                                                      |
|-------|--------------------------------------------------------------------------------------------------------------------------------------------------------------------------------------|
| BcHY5 | MQEQTTSSLPASSLPSSSERSSSSAPHLEIKEGIESDEEIRRVPEFGGEATG<br>KEISGSGTGQDQTQATVGGESQRKRGRTPAEKETKRLKRLLRNRVSAQQA<br>RERKKAYLGELENRVKDLENRNSELEERLSTLQENQMLRQILKNTGNKR<br>GGGGSNADASL       |
| BrHY5 | MQEQTTSSLPASSLPSSSERSSSSAPHLEIKEGIESDEEIRRVPEFGGEATGKEI<br>SGSVTGQDQTQATVGGESQRKRGRTPAEKETKRLKRLLRNRVSAQQA<br>RERKKAYLGELENRVKDLENRNSELEERLSTLQENQMLRQILKNTTGNKRGG<br>GGSNADASL      |
| BnHY5 | MQEQTTSSLPASSLPSSSERSSSSAPHLEIKEGIESDEEIRRVPEFGGEATGKEI<br>SGSGTGQDQTQATVGGESQRKRGRTPAEKETKRLKRLLRNRVSAQQA                                                                           |
| AtHY5 | MQEQATSSLAASSLPSSSERSSSSAPHLEIKEGIESDEEIRRVPEFGGEAVGKE<br>TSGRESGSATGQERTQATVGGESQRKRGRTPAEKENKRLKRLLRNRVSAQQA<br>RERKKAYLSELENRVKDLENKNSLEERLSTLQNE                                 |
| SIHY5 | MQEQATSSIAASSLPSSSERSSSSALHHELEKEGMESDDEIRRVPEMGGEATG<br>TTSASGRDGVSAAGQAQPSAGTQRKRGRSPADKENKRLKRLLRNRVSAQQ<br>ARERKKAYLIDLEARVKELETKNAELEERLSTLQENQ                                 |
| PpHY5 | MQEQATSSLAASSLPSSSERSSSSAFHLEVKEGMESDDEIGRVPEIGGESAG<br>ASASARENGSLAGPDQVQTAGESQRKRGRNPADKESKRLKRLLRNRVSAQ<br>QARERKKAYLNDLEVRVKELEQKNSSELDERLSTLQENQMLRHILKNSTASRRGADGSANA          |
| NtHY5 | MQEQATSSIAASSIPSSSERSSSSALHLEIHEGMESDDEIRRVPEMGGEAIGT<br>TSASGRDGN SATGQAQPSAGTQRKRGRSPADKENKRLKRLLRNRVSAQQA<br>RERKKAYLIDLEARVKELETKNAELEERLSTLQENQMLRHILKNNTTAGAQ<br>EGRK          |
| MdHY5 | MQEQATSSLAASSLPSSSERSSSSAFHLEVKEGMESDDEIGRVPEIGGESAG<br>ASASARENGLLAGPDQVQTAGESQRKRGRNPADKESKRLKRLLRNRVSAQ<br>QARERKKAYLNDLEVRVKELEQKNSSELDERLSTLQENQMLRHILKNNTTA<br>SRRGADGGANAD    |
| RsHY5 | MQEQTTSSLPASSMPSSSERSSSSAPHLEIKEGIESDEEIRRVPEFGGEGTGKE<br>ISGRESGSGTGQDQTQITVGGGEGQRKRGRTPAEKETKRLKRLLRNRVSAQ<br>QARERKKAYLGELENRVKDLENRNSELEERLSTLQENQMLRQILKNTTG<br>NKRGGGGSNADASL |

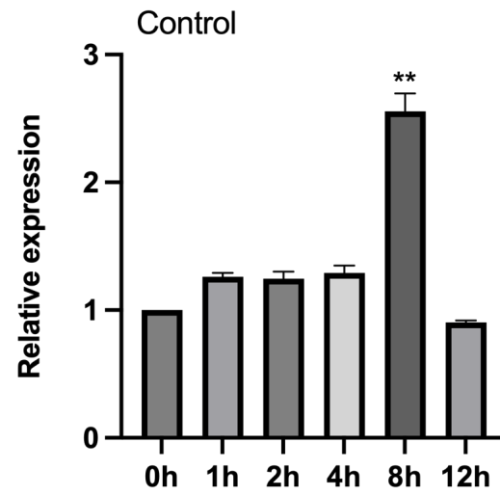

**Figure S1** The expression of *BcHY5* without any treatment. The expression of *BcHY5* under no-treatment conditions was sampled at 0 h, 1 h, 2 h, 4 h, 8 h, 12 h. Error bars represent the standard deviation among independent replicates. Asterisks (\*\*  $p < 0.01$ , Student's t-test) indicate statistical significance.
